# Supplementary material for: ‘Tablet-in-Syringe’: A Novel Dosing Mechanism for Dysphagic Patients Containing Fast-Disintegrating Tablets Fabricated Using Semisolid Extrusion 3D Printing
Source: MDPI journal article supplement (doi:10.3390/pharmaceutics14020443), 2022-02-18
Supplement: s1 [file s1]

# Supplementary Materials: ‘Tablet-in-Syringe’: A Novel Dosing Mechanism for Dysphagic Patients Containing Fast-Disintegrating Tablets Fabricated Using Semisolid Extrusion 3D Printing

Pattaraporn Panraksa, Bin Zhang, Pornchai Rachtanapun, Kittisak Jantanasakulwong, Sheng Qi and Pensak Jantrawut

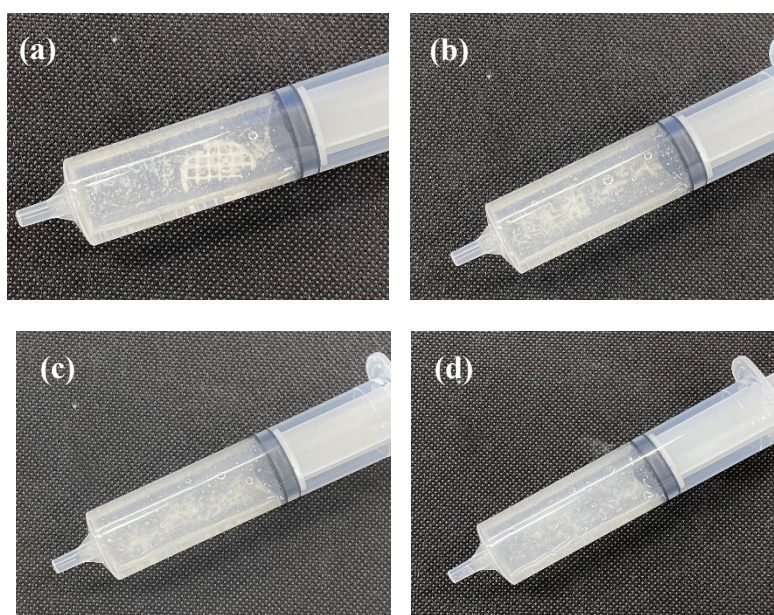

**Figure S1.** Disintegrating behavior of 3D-printed FDT with polymer:drug ratio ( $w/w$ ) of 1:30 and extrusion rates of 3.5  $\mu\text{L/s}$  in syringe at different time interval 15 s (a), 30 s (b), 45 s (c), 60 s (d).
